# Supplementary material
Source: PubMed Central journal article supplement (PMC3280562)

**E**

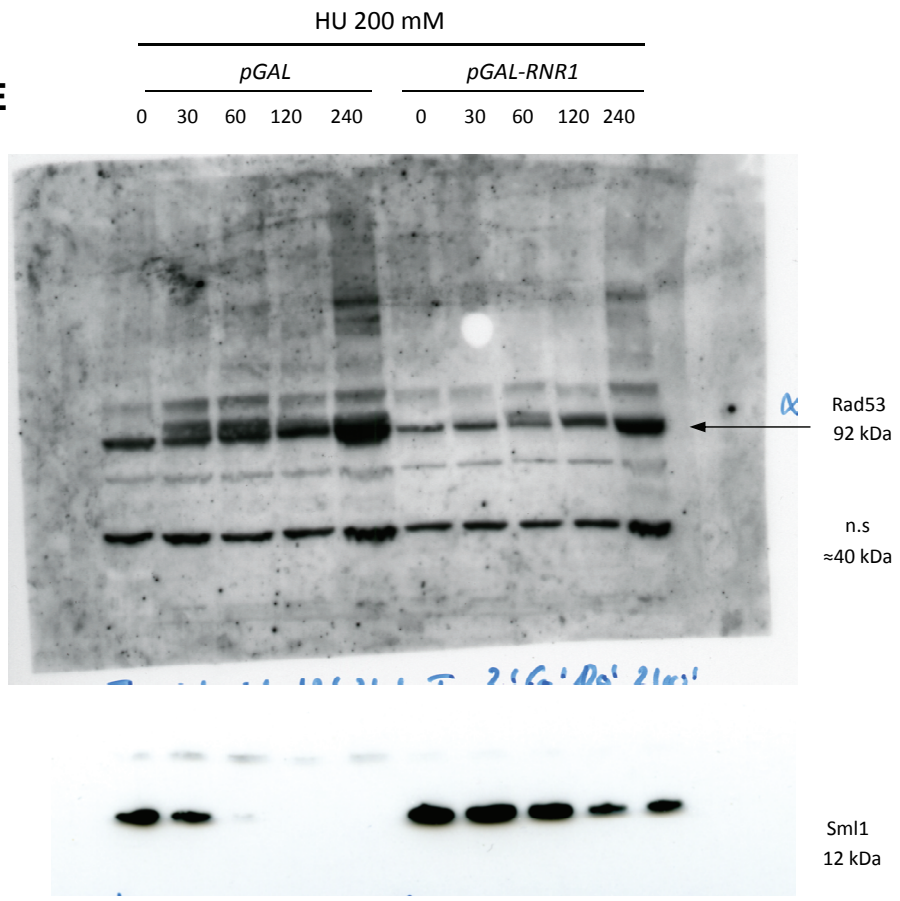

Figure 2

Supplement: emboj2011470s2.pdf [file emboj2011470s2.pdf]

**C**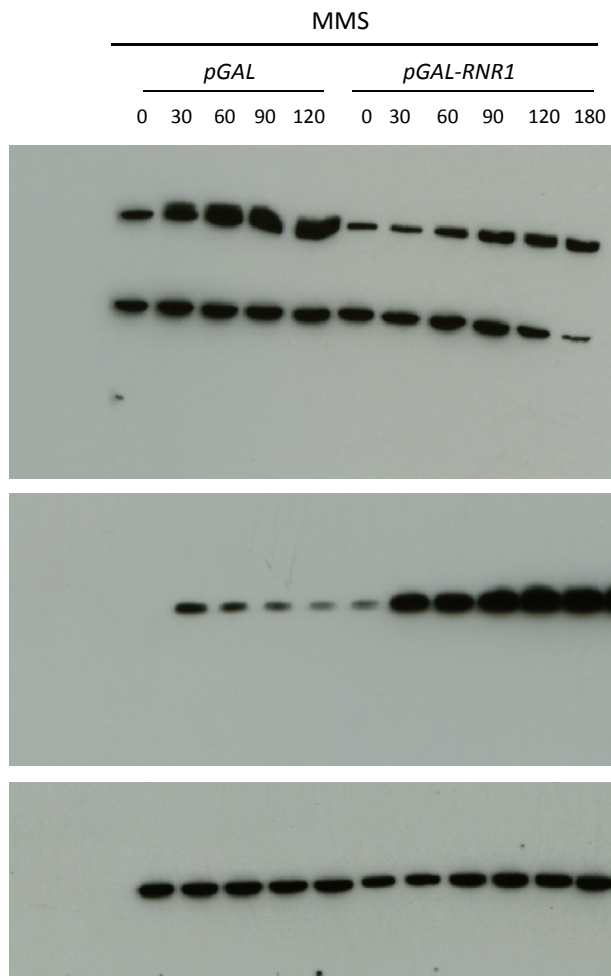**D**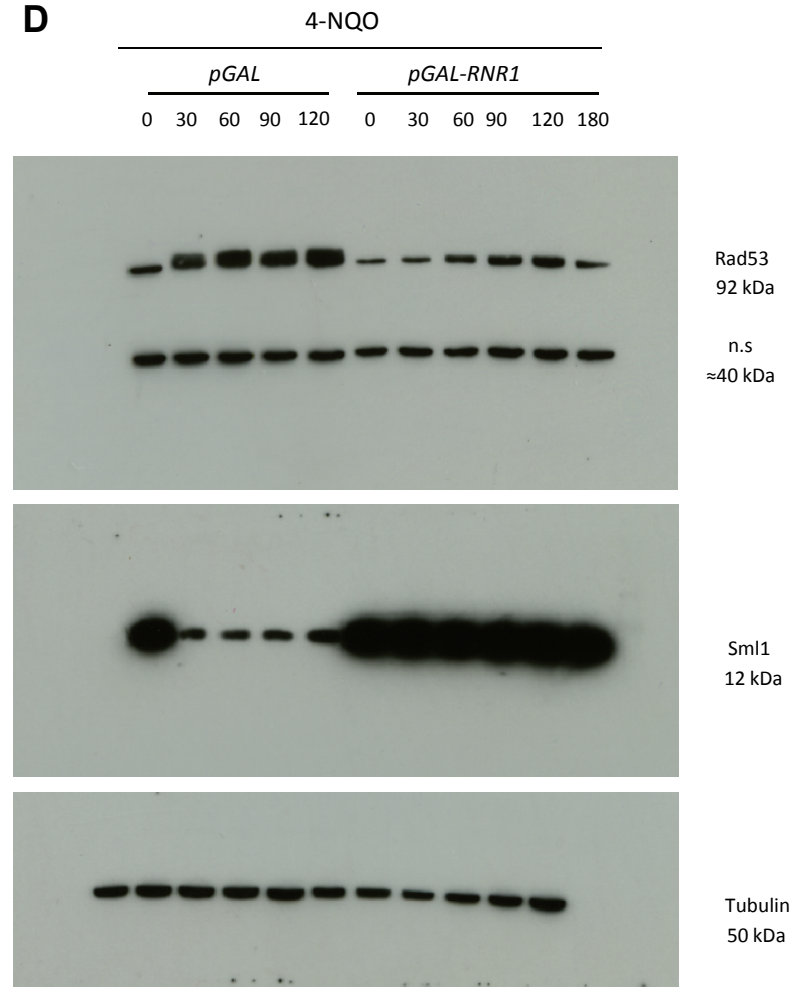

Figure 3

Supplement: emboj2011470s3.pdf [file emboj2011470s3.pdf]

**A**

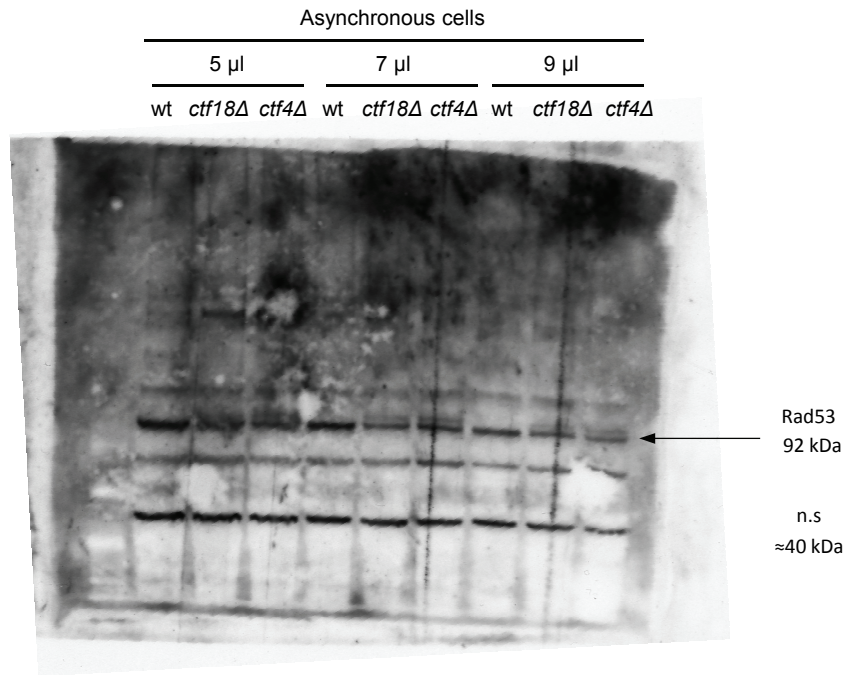

Figure 6

Supplement: emboj2011470s4.pdf [file emboj2011470s4.pdf]
